# Supplementary material for: A Co-MOF-derived Co9S8@NS-C electrocatalyst for efficient hydrogen evolution reaction
Source: Royal Society of Chemistry journal article supplement (doi:10.1039/d0ra10864b), 2021-01-01
Supplement: d0ra10864b1.pdf [file d0ra10864b1.pdf]

**Electronic Supporting Information (ESI)**  
**for**

**Co-MOF Derived Co<sub>9</sub>S<sub>8</sub>@NS-C Electrocatalyst for Efficient Hydrogen Evolution Reaction**

Yun-Wu Li,\* Qian Wu, Rui-Cong Ma, Xiao-Qi Sun, Dan-Dan Li, Hong-Mei Du, Hui-Yan Ma,\*  
Da-Cheng Li, Su-Na Wang\* and Jian-Min Dou

*<sup>a</sup> Shandong Provincial Key Laboratory of Chemical Energy Storage and Novel Cell Technology,  
and School of Chemistry and Chemical Engineering, Liaocheng University, Liaocheng 252000, P.  
R. China.*

---

\*Corresponding authors.

---

E-mails: [liyunwu@lcu.edu.cn](mailto:liyunwu@lcu.edu.cn); [mahuiyanyan@163.com](mailto:mahuiyanyan@163.com) (H. Y. Ma); [wangsuna@lcu.edu.cn](mailto:wangsuna@lcu.edu.cn) (S.-N. Wang)

---

---

## S1 Additional Experimental Section

### S1.1. Syntheses of $\{[\text{H}_2\text{N}(\text{CH}_3)_2]_2[\text{Co}(\text{BPTC})]\cdot 4\text{DMAC}\cdot 5\text{H}_2\text{O}\}_n$ (LCU-105).

A mixture of  $\text{Co}(\text{NO}_3)_3\cdot 6\text{H}_2\text{O}$  (87.31 mg, 0.3 mmol) and  $\text{H}_4\text{BPTC}$  (99 mg, 0.3 mmol) in DMAC (6 mL) was sealed in a Teflon-lined stainless steel vessel (23 mL), which was heated at 120 °C for 4 days and then cooled to room temperature at a rate of 10 °C·h<sup>-1</sup>. Block-like purple crystals of **LCU-105** were collected. Yield: 30 % based on Co. Elemental analysis (%) for activated sample **LCU-105a**,  $\text{C}_{20}\text{H}_{22}\text{O}_8\text{N}_2\text{Co}$  (M = 477.33): *Calcd.*: C, 50.32; H, 4.65; N, 5.87; *Found*: C, 50.41; H, 4.56; N, 5.81;. IR (KBr disk, cm<sup>-1</sup>) see **Fig. S3** in **SI**.

---

## S1.2. Crystal data for Co-MOF (LCU-105).

**Table S1. Crystal Data and Structure Refinement Parameters for LCU-105.**

| Co-MOF                     |                                                                   | LCU-105                                      |                |
|----------------------------|-------------------------------------------------------------------|----------------------------------------------|----------------|
| Formula                    | C <sub>36</sub> H <sub>68</sub> O <sub>17</sub> N <sub>6</sub> Co | Crystal system                               | Monoclinic     |
| $F_w$                      | 915.89                                                            | Space group                                  | <i>P2/c</i>    |
| $\lambda/\text{\AA}$       | 0.71073                                                           | <i>Z</i>                                     | 4              |
| <i>T</i> /K                | 100(2)                                                            | $D_c/\text{Mg}\cdot\text{m}^{-3}$            | 1.113          |
| <i>a</i> [Å]               | 19.601(4)                                                         | <i>F</i> (000)                               | 1144           |
| <i>b</i> [Å]               | 9.3797(19)                                                        | Reflections collected/unique                 | 26897/5995     |
| <i>c</i> [Å]               | 18.630(4)                                                         | $R_{\text{int}}$                             | 0.2573         |
| $\alpha$ [°]               | 90                                                                | Data/Restraints/Parameters                   | 5995/116/352   |
| $\beta$ [°]                | 95.69(3)                                                          | $R_1/wR_2$ [ $I > 2\sigma(I)$ ] <sup>a</sup> | 0.01492/0.3669 |
| $\gamma$ [°]               | 90                                                                | $R_1/wR_2$ [(all data)] <sup>a</sup>         | 0.2352/0.4167  |
| <i>V</i> (Å <sup>3</sup> ) | 3408.3(12)                                                        | GOF on $F^2$                                 | 1.130          |

<sup>a</sup>  $R_1 = \Sigma(|F_o| - |F_c|)/\Sigma|F_o|$   $wR_2 = [\Sigma w(|F_o|^2 - |F_c|^2)^2/(\Sigma w|F_o|^2)^2]^{1/2}$ .

## S2. Figures in Supporting Information

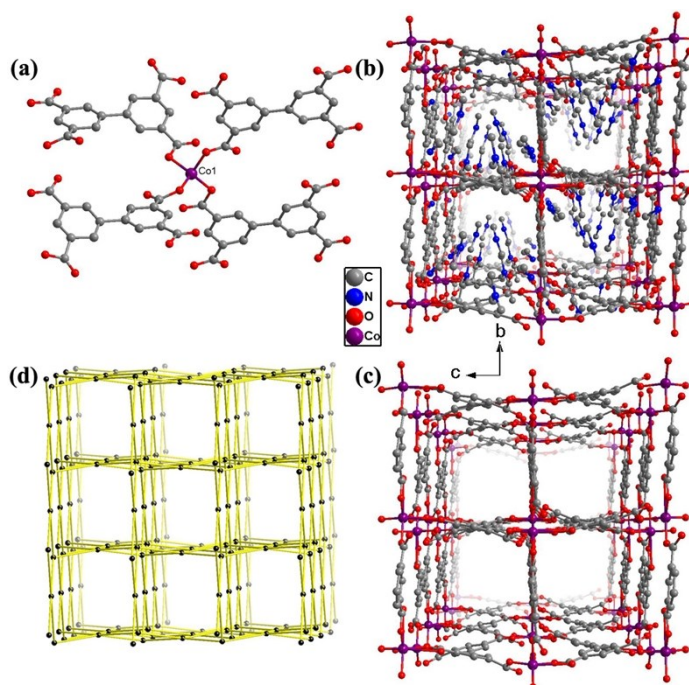

**Fig. S1.** (a) The ball and stick mode of coordination environment around  $\text{Co}^{2+}$  in **LCU-105**; (b) the 3D structure including  $[\text{NH}_2(\text{CH}_3)_2]^+$  cations and DMAC solvents of **LCU-105** along  $a$  axis; (c) the 3D microporous framework without  $[\text{NH}_2(\text{CH}_3)_2]^+$  cations and DMAC solvents of **LCU-105a** along  $a$  axis; (d) the simplified **pts** topology of **LCU-105**. Color codes: blue, N; gray, C; red, O; violet, Co. (The hydrogen atoms are omitted for clarity)

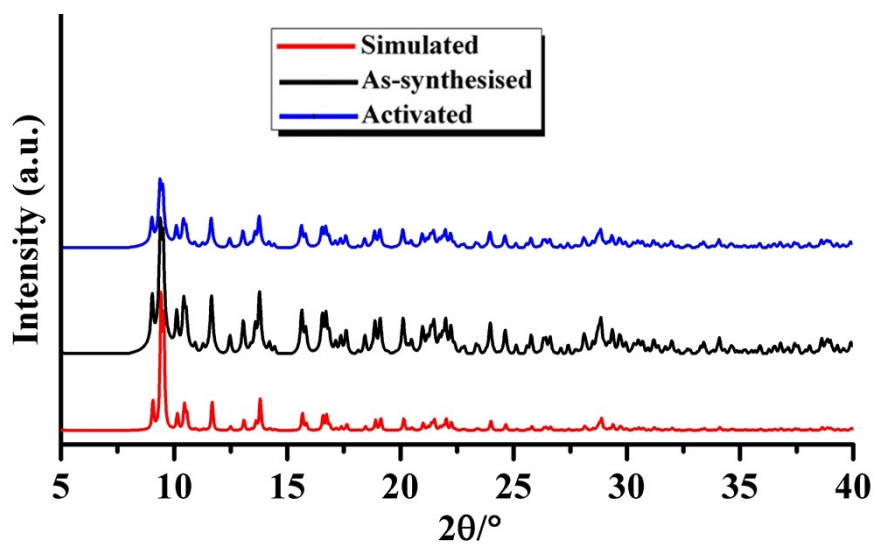

**Fig. S2.** PXRD patterns of **LCU-105** and **LCU-105a**.

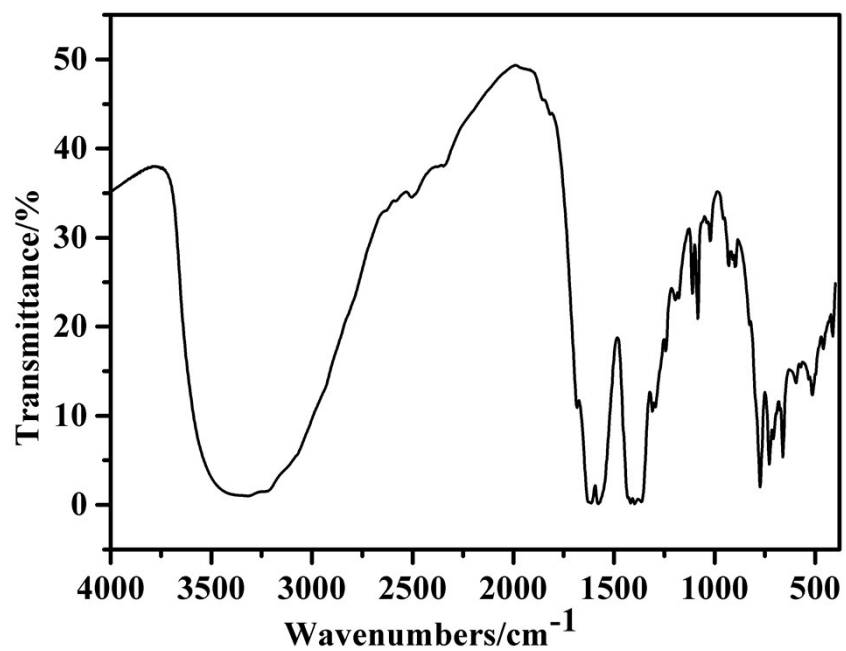

Fig. S3. IR spectra of compound LCU-105.

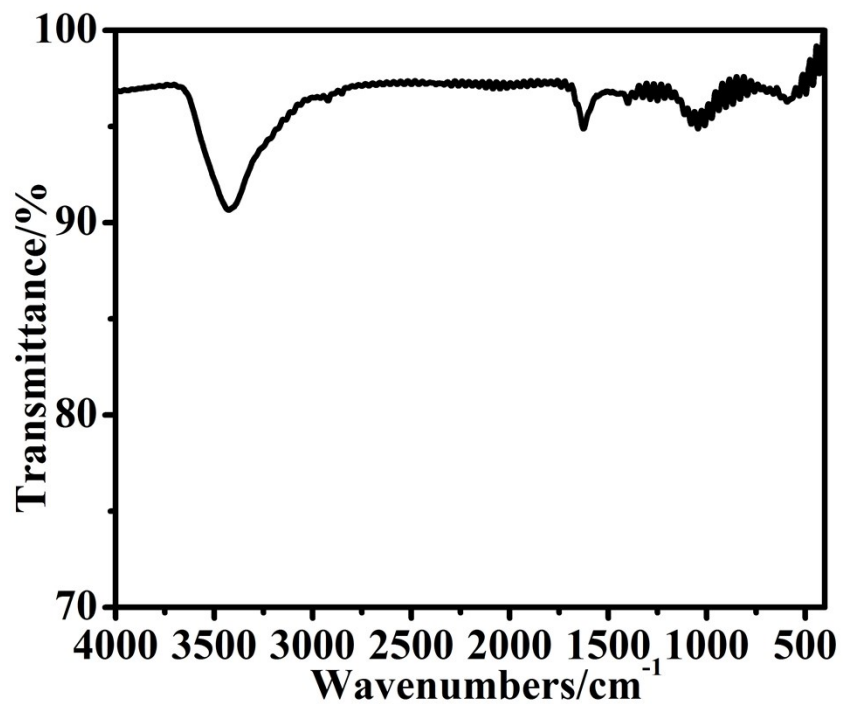

Fig. S4. IR spectra of Co<sub>9</sub>S<sub>8</sub>@NS-C-900 composite.

**Table S2.** Comparison of HER performances of Co<sub>9</sub>S<sub>8</sub>@NS-C-900 with recently reported cobalt based catalysts in KOH.

| Catalysts                                              | $\eta$ (mV) at $J = 10 \text{ mA cm}^{-2}$ | Tafel slope (mV dec <sup>-1</sup> ) | References                                                        |
|--------------------------------------------------------|--------------------------------------------|-------------------------------------|-------------------------------------------------------------------|
| <b>Co<sub>9</sub>S<sub>8</sub>@NS-C-900</b>            | <b>86.4</b>                                | <b>81.1</b>                         | <b>This work</b>                                                  |
| Co <sub>9</sub> S <sub>8</sub> @MoS <sub>2</sub> /CNFs | 190                                        | 110                                 | <i>Adv. Mater.</i> , 2015, <b>27</b> , 4752–4759.                 |
| Co <sub>9</sub> S <sub>8</sub> /CNFs                   | 304                                        | 140                                 | <i>Adv. Mater.</i> , 2018, <b>30</b> , 1707301.                   |
| Co <sub>9</sub> S <sub>8</sub> /1L MoS <sub>2</sub>    | 95                                         | 71                                  |                                                                   |
| Co <sub>9</sub> S <sub>8</sub> /2L MoS <sub>2</sub>    | 124                                        | 92                                  |                                                                   |
| Co <sub>9</sub> S <sub>8</sub> /3L MoS <sub>2</sub>    | 175                                        | 101                                 |                                                                   |
| Co <sub>9</sub> S <sub>8</sub> /4L MoS <sub>2</sub>    | 181                                        | 108                                 |                                                                   |
| Co <sub>9</sub> S <sub>8</sub> /5L MoS <sub>2</sub>    | 208                                        | 145                                 |                                                                   |
| Co <sub>9</sub> S <sub>8</sub> /NSG-220                | 147                                        | 97                                  | <i>ACS Sustainable Chem. Eng.</i> , 2019, <b>7</b> , 19442–19452. |
| Co <sub>9</sub> S <sub>8</sub> /N,S-rGO                | 266                                        | 75.5                                | <i>Sci. Rep.</i> , 2019, <b>9</b> , 1951.                         |
| Co <sub>9</sub> S <sub>8</sub> @N-S-HPC                | 173                                        | 78                                  | <i>App. Catal. B: Environ.</i> , 2019, <b>254</b> , 186–193.      |
| Co <sub>9</sub> S <sub>8</sub> /MoS <sub>2</sub> @NSOC | 194                                        | 118                                 | <i>J. Energy Chem.</i> , 2020, <b>44</b> , 90–96.                 |
| Co <sub>9</sub> S <sub>8</sub> Nanotubes               | 320 ( $J_{20}$ )                           | --                                  | <i>Am. J. Anal. Chem.</i> , 2016, <b>7</b> , 210–218.             |
| CoS <sub>2</sub> pyramids                              | 244                                        | 133                                 | <i>Electrochimica Acta</i> , 2014, <b>148</b> , 170–174.          |
| CoS <sub>2</sub> /rGO/CNTs                             | 143                                        | 51                                  | <i>Angew. Chem. Int. Ed.</i> , 2014, <b>53</b> , 12594–12599.     |
| CoS <sub>2</sub>                                       | 327                                        | 148                                 |                                                                   |
| CoS <sub>2</sub> /rGO                                  | 278                                        | 82                                  |                                                                   |
| Co@N-Doped Carbon                                      | 200 ( $J_{13.6}$ )                         | 79.3                                | <i>Chem. Mater.</i> , 2015, <b>27</b> , 2026–2032.                |
| CoS <sub>2</sub> nanowires                             | 145                                        | 51.6                                | <i>J. Am. Chem. Soc.</i> , 2014, <b>136</b> , 10053–10061.        |
| Co NPs@NC                                              | 210                                        | 108                                 | <i>J. Mater. Chem. A</i> , 2014, <b>2</b> , 20067–20074.          |
| CoN <sub>x</sub> /C                                    | 170                                        | 75                                  | <i>Nat. Commun.</i> , 2015, <b>6</b> , 7992.                      |
| Co-N-doped Graphene                                    | 187                                        | 82                                  | <i>Nat. Commun.</i> , 2015, <b>6</b> , 8668.                      |
| Co@N-CNTs@rGO                                          | 108                                        | 55                                  | <i>Adv. Mater.</i> , 2018, <b>30</b> , 1802011.                   |
| Co-NC/CNT                                              | 201                                        | 121                                 | <i>J. Mater. Chem. A</i> , 2016, <b>4</b> , 16057–16063.          |
| Co-NRCNTs                                              | 370                                        | --                                  | <i>Angew. Chem. Int. Ed.</i> ,                                    |

---

|                                          |     |     |                                                          |
|------------------------------------------|-----|-----|----------------------------------------------------------|
|                                          |     |     | 2014, <b>53</b> , 4372–4376.                             |
| Co-P@Co <sub>3</sub> O <sub>4</sub> /CC  | 73  | 85  | <i>Chem. Commun.</i> , 2018, <b>54</b> , 2150–2153.      |
| Co-NC/CF                                 | 157 | 109 | <i>Energy Environ. Sci.</i> , 2020, <b>13</b> , 545–553. |
| Co@NG/NRGO                               | 70  | 64  | <i>Chem. Commun.</i> , 2020, <b>56</b> , 567–570.        |
| CoO@MOFC                                 | 190 | 98  | <i>Chem.</i> , 2017, <b>2</b> , 791–802.                 |
| Carbon paper/carbon tubes/cobalt-sulfide | 190 | 138 | <i>ACS Nano</i> , 2016, <b>10</b> , 2342–2348.           |

---
